# Supplementary material for: Long-term cultivation-independent microbial diversity analysis demonstrates that bacterial communities infecting the adult cystic fibrosis lung show stability and resilience
Source: HighWire-hosted journal article supplement (doi:10.1136/thoraxjnl-2011-200932), 2012-06-15

**Supplementary Table 1. Patient information<sup>1</sup>.**

| subject | age     | gender | genotype I | genotype II | mean FEV <sub>1</sub> (%predicted) for the year | BMI  | diabetes | number of CFPE over the period months studied | CFPE | CFPE occurrence (days) from study start, across full collection period | short term medications |                              |           |               | long term medications |                          |              |                      |                         |       |                   |  |  |  |  |  |
|---------|---------|--------|------------|-------------|-------------------------------------------------|------|----------|-----------------------------------------------|------|------------------------------------------------------------------------|------------------------|------------------------------|-----------|---------------|-----------------------|--------------------------|--------------|----------------------|-------------------------|-------|-------------------|--|--|--|--|--|
|         |         |        |            |             |                                                 |      |          |                                               |      |                                                                        | PO antibiotics         | IV antibiotics               | macrolide | colomycin neb | tobramycin neb        | col/tob neb (alt months) | itraconazole | oral corticosteroids | inhaled corticosteroids | DNase | hypertonic saline |  |  |  |  |  |
| 1       | 30      | male   | phe508del  | unknown     | 54.9                                            | 29   | no       | 3                                             | 1    | 95-130                                                                 | doxy, azit, cibr       | fluc, gent, tobr, mero       | no        | no            | no                    | no                       | no           | no                   | yes                     | yes   | no                |  |  |  |  |  |
|         |         |        |            |             |                                                 |      |          |                                               | 2    | 151-161                                                                | cibr, fluc             |                              |           |               |                       |                          |              |                      |                         |       |                   |  |  |  |  |  |
|         |         |        |            |             |                                                 |      |          |                                               | 3    | 237-256                                                                | cibr, doxy             |                              |           |               |                       |                          |              |                      |                         |       |                   |  |  |  |  |  |
| 2       | 45      | female | phe508del  | unknown     | 40.2                                            | 18.5 | yes      | 3 (+1 <sup>a</sup> )                          | 1    | 1- 14                                                                  |                        | ceft, tobr                   | yes       | yes           | no                    | no                       | no           | no                   | yes                     | no    | no                |  |  |  |  |  |
|         |         |        |            |             |                                                 |      |          |                                               | 2    | 88-105                                                                 |                        | colo, tobr                   |           |               |                       |                          |              |                      |                         |       |                   |  |  |  |  |  |
|         |         |        |            |             |                                                 |      |          |                                               | EI   | 191-198                                                                | doxy                   |                              |           |               |                       |                          |              |                      |                         |       |                   |  |  |  |  |  |
| 3       | 254-268 |        | colo, tobr |             |                                                 |      |          |                                               |      |                                                                        |                        |                              |           |               |                       |                          |              |                      |                         |       |                   |  |  |  |  |  |
| 3       | 47      | male   | phe508del  | unknown     | 33.9                                            | 20.7 | yes      | 0                                             | 0    |                                                                        |                        |                              | yes       | yes           | no                    | no                       | no           | no                   | yes                     | yes   | no                |  |  |  |  |  |
| 4       | 30      | female | phe508del  | 711+3A7G    | 38.2                                            | 25   | no       | 3                                             | 1    | 175-189                                                                | co-am, fluc            |                              | yes       | no            | no                    | no                       | no           | no                   | yes                     | yes   | no                |  |  |  |  |  |
|         |         |        |            |             |                                                 |      |          |                                               | 2    | 235-249                                                                | doxy                   |                              |           |               |                       |                          |              |                      |                         |       |                   |  |  |  |  |  |
|         |         |        |            |             |                                                 |      |          |                                               | 3    | 349-362                                                                | doxy                   |                              |           |               |                       |                          |              |                      |                         |       |                   |  |  |  |  |  |
| 5       | 22      | female | phe508del  | phe508del   | 36.2                                            | 19   | no       | 5                                             | 1    | 62-105                                                                 |                        | colo, ceft, mero, tobr, amik | yes       | yes           | no                    | no                       | yes          | no                   | yes                     | yes   | no                |  |  |  |  |  |
|         |         |        |            |             |                                                 |      |          |                                               | 2    | 126-135                                                                | doxy                   |                              |           |               |                       |                          |              |                      |                         |       |                   |  |  |  |  |  |
|         |         |        |            |             |                                                 |      |          |                                               | 3    | 153-167                                                                | doxy                   |                              |           |               |                       |                          |              |                      |                         |       |                   |  |  |  |  |  |
|         |         |        |            |             |                                                 |      |          |                                               | 4    | 215-239                                                                | cibr                   | mero, amik                   |           |               |                       |                          |              |                      |                         |       |                   |  |  |  |  |  |
|         |         |        |            |             |                                                 |      |          |                                               | 5    | 322-345                                                                | doxy                   | mero, amik                   |           |               |                       |                          |              |                      |                         |       |                   |  |  |  |  |  |
| 6       | 55      | male   | phe508del  | G85E        | 52.2                                            | 24.5 | no       | 2                                             | 1    | 210-220                                                                | cibr                   |                              | yes       | yes           | no                    | no                       | no           | no                   | yes                     | yes   | no                |  |  |  |  |  |
|         |         |        |            |             |                                                 |      |          |                                               | 2    | 251-261                                                                |                        | ceft, gent                   |           |               |                       |                          |              |                      |                         |       |                   |  |  |  |  |  |

<sup>1</sup> “neb” – nebulised, “EI” – elective antibiotics, <sup>a</sup> - for sinus infection, <sup>b</sup> - for skin infection, <sup>c</sup> - as maintenance therapy, <sup>d</sup> - for haemoptysis. “amik” – amikacin, “amox” – amoxicillin, “azit” – azithromycin, “ceft” – ceftazidime, “cibr” – ciprofloxacin, “clar” – clarithromycin, “co-am” – co-amoxiclav, “colo” – colomycin, “doxy” – doxycycline, “eryt” – erythromycin, “fluc” – flucloxacillin, “mero” – meropenem, “metr” – metronidazole, “pipe” – piperacillin, “tazo” – tazobactam



**Supplementary Table 2. Sample information.<sup>2</sup>**

| subject  | sample | days since study start | clinical status              | subject   | sample | days since study start | clinical status       |
|----------|--------|------------------------|------------------------------|-----------|--------|------------------------|-----------------------|
| <b>1</b> | 1      | 1*                     | stable                       | <b>08</b> | 1      | 1*                     | stable                |
|          | 2      | 24                     | stable                       |           | 2      | 18                     | stable                |
|          | 3      | 50                     | stable                       |           | 3      | 46                     | stable                |
|          | 4      | 80                     | 3 days prior CFPE            |           | 4      | 76                     | stable                |
|          | 5      | 120                    | 8 days post CFPE             |           | 5      | 109                    | stable                |
|          | 6      | 141                    | start of CFPE (prior to abx) |           | 6      | 158                    | stable                |
|          | 7      | 188                    | stable                       |           | 7      | 176                    | stable                |
|          | 8      | 220                    | 5 days prior CFPE            |           | 8      | 211                    | stable                |
|          | 9      | 260                    | 15 days post CFPE            |           | 9      | 237                    | stable                |
|          | 10     | 286                    | stable                       |           | 10     | 270                    | exacerbating (day 6)  |
|          | 11     | 323                    | stable                       |           | 11     | 305                    | stable                |
|          | 12     | 344                    | stable                       |           | 12     | 349                    | stable                |
| <b>2</b> | 1      | 1                      | 16 days post CFPE            | <b>09</b> | 1      | 1                      | stable                |
|          | 2      | 19*                    | stable                       |           | 2      | 10*                    | stable                |
|          | 3      | 49                     | 13 days prior CFPE           |           | 3      | 31                     | stable                |
|          | 4      | 93                     | 17 days post CFPE            |           | 4      | 57                     | stable                |
|          | 5      | 119                    | stable                       |           | 5      | 89                     | stable                |
|          | 6      | 145                    | stable                       |           | 6      | 176                    | 12 days prior CFPE    |
|          | 7      | 175                    | stable                       |           | 7      | 218                    | 15 days post CFPE     |
|          | 8      | 191                    | stable                       |           | 8      | 234                    | 12 days prior CFPE    |
|          | 9      | 227                    | exacerbating (day 3)         |           | 9      | 291                    | stable                |
|          | 10     | 264                    | stable                       |           | 10     | 305                    | stable                |
|          | 11     | 285                    | stable                       |           | 11     | 311                    | 15 days prior CFPE    |
|          | 12     | 324                    | stable                       |           | 12     | 332                    | exacerbating (day 6)  |
| <b>3</b> | 1      | 1*                     | stable                       | <b>10</b> | 1      | 1*                     | stable                |
|          | 2      | 38                     | stable                       |           | 2      | 29                     | stable                |
|          | 3      | 70                     | stable                       |           | 3      | 57                     | stable                |
|          | 4      | 103                    | stable                       |           | 4      | 83                     | 13 days prior CFPE    |
|          | 5      | 131                    | stable                       |           | 5      | 134                    | 19 days post CFPE     |
|          | 6      | 161                    | stable                       |           | 6      | 144                    | stable                |
|          | 7      | 189                    | stable                       |           | 7      | 181                    | stable                |
|          | 8      | 220                    | stable                       |           | 8      | 204                    | stable                |
|          | 9      | 257                    | stable                       |           | 9      | 221                    | 16 days prior CFPE    |
|          | 10     | 283                    | stable                       |           | 10     | 270                    | 16 days post CFPE     |
|          | 11     | 306                    | stable                       |           | 11     | 291                    | stable                |
|          | 12     | 348                    | stable                       |           | 12     | 321                    | 3 days prior CFPE     |
| <b>4</b> | 1      | 1*                     | stable                       | <b>11</b> | 1      | 1*                     | stable                |
|          | 2      | 22                     | stable                       |           | 2      | 31                     | stable                |
|          | 3      | 52                     | stable                       |           | 3      | 52                     | stable                |
|          | 4      | 93                     | stable                       |           | 4      | 83                     | exacerbating (day 10) |
|          | 5      | 168                    | exacerbating (day 2)         |           | 5      | 125                    | stable                |
|          | 6      | 200                    | 19 days post CFPE            |           | 6      | 150                    | stable                |
|          | 7      | 213                    | 13 days prior CFPE           |           | 7      | 162                    | 9 days prior CFPE     |
|          | 8      | 226                    | start of CFPE (prior to abx) |           | 8      | 209                    | exacerbating (day 10) |
|          | 9      | 263                    | stable                       |           | 9      | 239                    | stable                |
|          | 10     | 308                    | 20 days prior CFPE           |           | 10     | 269                    | stable                |
|          | 11     | 320                    | 9 days prior CFPE            |           | 11     | 304                    | stable                |
|          | 12     | 331                    | stable                       |           | 12     | 337                    | stable                |
| <b>5</b> | 1      | 1*                     | stable                       | <b>12</b> | 1      | 1*                     | 13 days prior CFPE    |
|          | 2      | 22                     | stable                       |           | 2      | 41                     | 14 days post CFPE     |
|          | 3      | 51                     | 7 days prior CFPE            |           | 3      | 62                     | stable                |
|          | 4      | 87                     | stable                       |           | 4      | 98                     | stable                |

<sup>2</sup> \* - sequenced for assignment of species identities to T-RF band lengths. Where samples were collected between two CFPE less than 42 days apart, the days to the nearest CFPE in time are shown. Samples taken at the start of CFPE were obtained before antibiotics (abx) were given.

|          |    |     |                       |
|----------|----|-----|-----------------------|
|          | 5  | 113 | 12 days post CFPE     |
|          | 6  | 138 | 7 days post CFPE      |
|          | 7  | 176 | 13 days post CFPE     |
|          | 8  | 204 | 7 days prior CFPE     |
|          | 9  | 228 | exacerbating (day 17) |
|          | 10 | 255 | 19 days post CFPE     |
|          | 11 | 285 | stable                |
|          | 12 | 311 | stable                |
| <b>6</b> | 1  | 1*  | stable                |
|          | 2  | 19  | stable                |
|          | 3  | 52  | stable                |
|          | 4  | 84  | stable                |
|          | 5  | 113 | stable                |
|          | 6  | 138 | stable                |
|          | 7  | 171 | stable                |
|          | 8  | 190 | 9 days prior CFPE     |
|          | 9  | 229 | 19 days post CFPE     |
|          | 10 | 264 | 13 days post CFPE     |
|          | 11 | 311 | stable                |
|          | 12 | 351 | stable                |
| <b>7</b> | 1  | 1   | stable                |
|          | 2  | 29* | stable                |
|          | 3  | 48  | stable                |
|          | 4  | 80  | stable                |
|          | 5  | 111 | stable                |
|          | 6  | 143 | exacerbating (day 3)  |
|          | 7  | 171 | stable                |
|          | 8  | 192 | stable                |
|          | 9  | 213 | 13 days prior CFPE    |
|          | 10 | 272 | stable                |
|          | 11 | 310 | exacerbating (day 1)  |
|          | 12 | 351 | stable                |

|           |    |     |                              |
|-----------|----|-----|------------------------------|
|           | 5  | 132 | exacerbating (day 13)        |
|           | 6  | 148 | exacerbating (day 12)        |
|           | 7  | 170 | 2 days post CFPE             |
|           | 8  | 193 | 2 days prior CFPE            |
|           | 9  | 225 | 20 days post CFPE            |
|           | 10 | 245 | stable                       |
|           | 11 | 358 | stable                       |
|           | 12 | 371 | stable                       |
| <b>13</b> | 1  | 1*  | stable                       |
|           | 2  | 24  | 16 days prior CFPE           |
|           | 3  | 76  | exacerbating (day 5)         |
|           | 4  | 112 | stable                       |
|           | 5  | 139 | stable                       |
|           | 6  | 160 | 14 days prior CFPE           |
|           | 7  | 199 | 13 days post CFPE            |
|           | 8  | 223 | stable                       |
|           | 9  | 234 | 12 days prior CFPE           |
|           | 10 | 247 | exacerbating (day 1)         |
|           | 11 | 316 | stable                       |
|           | 12 | 339 | stable                       |
| <b>14</b> | 1  | 1   | exacerbating (day 1)         |
|           | 2  | 50  | stable                       |
|           | 3  | 62* | stable                       |
|           | 4  | 90  | stable                       |
|           | 5  | 120 | exacerbating (day 3)         |
|           | 6  | 155 | stable                       |
|           | 7  | 181 | stable                       |
|           | 8  | 207 | stable                       |
|           | 9  | 231 | start of CFPE (prior to abx) |
|           | 10 | 267 | stable                       |
|           | 11 | 316 | 13 days post CFPE            |
|           | 12 | 351 | stable                       |

**Supplementary Table 3.** Microbiological culture data.

| patient | sample | gram negative bacilli |                                    |                                |                           |                       | gram positive cocci                      |                              |                                 | mixed organisms |              | fungi and yeasts                       |                                     |                        |        |
|---------|--------|-----------------------|------------------------------------|--------------------------------|---------------------------|-----------------------|------------------------------------------|------------------------------|---------------------------------|-----------------|--------------|----------------------------------------|-------------------------------------|------------------------|--------|
|         |        | coliform              | <i>P. aeruginosa</i><br>non mucoid | <i>P. aeruginosa</i><br>mucoid | <i>Pseudomonas</i><br>sp. | <i>S. maltophilia</i> | <i>S. aureus</i><br>(MSSA <sup>3</sup> ) | <i>Staphylococcus</i><br>sp. | <i>Streptococcus</i><br>Group F | oral flora      | unidentified | <i>Aspergillus</i><br><i>fumigatus</i> | <i>Aspergillus</i><br><i>flavus</i> | <i>Aspergillus</i> sp. | yeasts |
| 1       | 1      |                       |                                    |                                |                           |                       |                                          |                              |                                 |                 |              |                                        |                                     |                        |        |
|         | 2      |                       |                                    |                                | 1                         |                       | 1                                        |                              |                                 |                 |              | 1                                      |                                     |                        |        |
|         | 3      |                       |                                    |                                |                           |                       |                                          |                              |                                 |                 | 1            |                                        |                                     |                        |        |
|         | 4      |                       |                                    |                                |                           |                       |                                          |                              |                                 |                 |              |                                        |                                     |                        |        |
|         | 5      |                       |                                    | 1                              | 2                         |                       |                                          |                              |                                 |                 |              |                                        | 1                                   |                        |        |
|         | 6      |                       |                                    |                                | 1                         | 1                     |                                          |                              |                                 |                 | 1            |                                        |                                     |                        |        |
|         | 7      |                       |                                    |                                |                           |                       | 1                                        |                              |                                 |                 | 1            |                                        |                                     |                        |        |
|         | 8      |                       | 1                                  |                                |                           |                       | 1                                        |                              |                                 |                 | 1            |                                        |                                     |                        |        |
|         | 9      |                       | 1                                  |                                |                           |                       |                                          |                              |                                 |                 | 1            |                                        |                                     |                        |        |
|         | 10     |                       |                                    |                                |                           | 1                     |                                          |                              |                                 |                 |              | 1                                      |                                     | 1                      |        |
|         | 11     |                       |                                    |                                |                           | 1                     |                                          |                              | 1                               |                 |              | 1                                      |                                     |                        |        |
|         | 12     |                       |                                    |                                |                           |                       | 1                                        |                              |                                 |                 | 1            |                                        |                                     |                        |        |
| 2       | 1      |                       | 1                                  | 1                              |                           |                       |                                          |                              |                                 |                 |              |                                        |                                     |                        |        |
|         | 2      |                       | 1                                  |                                |                           |                       |                                          |                              |                                 | 1               |              | 1                                      |                                     |                        |        |
|         | 3      |                       |                                    |                                | 2                         |                       |                                          |                              |                                 |                 |              |                                        |                                     |                        |        |
|         | 4      |                       |                                    |                                |                           |                       |                                          |                              |                                 |                 |              |                                        |                                     |                        |        |
|         | 5      |                       |                                    |                                |                           |                       |                                          |                              |                                 |                 |              |                                        |                                     |                        |        |
|         | 6      |                       |                                    |                                |                           |                       |                                          |                              |                                 |                 |              |                                        |                                     |                        |        |
|         | 7      |                       |                                    |                                |                           |                       |                                          |                              |                                 |                 |              |                                        |                                     |                        |        |
|         | 8      |                       | 1                                  | 1                              | 1                         |                       |                                          |                              |                                 | 1               |              |                                        |                                     | 1                      | 1      |
|         | 9      |                       |                                    |                                |                           |                       |                                          |                              |                                 |                 |              |                                        |                                     |                        |        |
|         | 10     |                       |                                    |                                | 2                         |                       |                                          |                              |                                 | 1               |              | 1                                      |                                     |                        |        |
|         | 11     |                       | 1                                  | 1                              |                           |                       | 1                                        |                              |                                 |                 |              | 1                                      |                                     |                        |        |
|         | 12     |                       | 1                                  |                                | 2                         |                       | 1                                        |                              |                                 |                 | 1            | 1                                      |                                     |                        |        |
| 3       | 1      |                       |                                    | 1                              | 1                         |                       |                                          |                              |                                 | 1               |              |                                        |                                     |                        |        |
|         | 2      |                       |                                    | 1                              | 1                         |                       |                                          |                              |                                 | 1               |              |                                        |                                     |                        |        |
|         | 3      |                       |                                    | 1                              | 1                         |                       |                                          |                              |                                 | 1               |              |                                        |                                     |                        |        |
|         | 4      |                       |                                    | 1                              | 2                         |                       |                                          |                              |                                 |                 |              |                                        |                                     |                        |        |
|         | 5      |                       |                                    |                                | 2                         |                       |                                          |                              |                                 | 1               |              |                                        |                                     |                        |        |
|         | 6      |                       |                                    |                                |                           |                       |                                          |                              |                                 |                 |              |                                        |                                     |                        |        |
|         | 7      |                       |                                    |                                |                           |                       |                                          |                              |                                 |                 |              |                                        |                                     |                        |        |
|         | 8      |                       |                                    |                                | 2                         |                       |                                          |                              |                                 |                 |              |                                        |                                     |                        |        |
|         | 9      |                       |                                    |                                |                           |                       |                                          |                              |                                 |                 |              |                                        |                                     |                        |        |
|         | 10     |                       |                                    |                                | 2                         |                       |                                          |                              |                                 | 2               |              |                                        |                                     |                        |        |
|         | 11     |                       |                                    |                                | 2                         |                       |                                          |                              |                                 | 1               |              |                                        |                                     |                        | 1      |
|         | 12     |                       |                                    |                                | 3                         |                       |                                          |                              |                                 | 1               |              |                                        |                                     |                        |        |
| 4       | 1      |                       |                                    |                                |                           |                       |                                          |                              |                                 | 1               |              |                                        |                                     |                        |        |
|         | 2      |                       |                                    |                                |                           |                       | 1                                        |                              |                                 | 1               |              |                                        |                                     |                        |        |
|         | 3      |                       |                                    |                                |                           |                       |                                          |                              |                                 |                 |              |                                        |                                     |                        |        |
|         | 4      |                       |                                    |                                | 1                         |                       |                                          |                              |                                 |                 |              |                                        |                                     |                        |        |
|         | 5      |                       |                                    |                                |                           |                       |                                          |                              |                                 |                 |              |                                        |                                     |                        |        |
|         | 6      |                       |                                    |                                | 1                         |                       |                                          |                              |                                 |                 |              |                                        |                                     |                        |        |
|         | 7      |                       |                                    |                                | 1                         |                       | 1                                        |                              |                                 |                 | 1            |                                        |                                     |                        |        |
|         | 8      |                       |                                    |                                |                           |                       |                                          |                              |                                 |                 | 1            |                                        |                                     |                        |        |

<sup>3</sup> Methicillin sensitive *Staphylococcus aureus*



|    |    |  |   |   |   |   |   |   |   |
|----|----|--|---|---|---|---|---|---|---|
|    | 5  |  | 1 |   |   | 1 |   |   |   |
|    | 6  |  |   | 2 |   | 1 |   |   |   |
|    | 7  |  |   |   |   |   |   |   |   |
|    | 8  |  |   |   |   |   |   |   |   |
|    | 9  |  | 1 |   |   | 1 |   |   |   |
|    | 10 |  | 1 | 1 |   | 1 |   |   |   |
|    | 11 |  |   |   |   |   |   |   |   |
|    | 12 |  | 1 | 1 |   |   |   |   |   |
| 10 | 1  |  | 1 | 1 |   | 1 |   | 1 |   |
|    | 2  |  |   | 1 |   | 1 |   | 1 |   |
|    | 3  |  |   | 1 |   | 1 |   | 1 |   |
|    | 4  |  |   |   |   | 1 |   | 1 |   |
|    | 5  |  |   | 1 |   |   |   |   |   |
|    | 6  |  | 1 |   |   | 1 |   | 1 |   |
|    | 7  |  |   |   |   |   |   |   |   |
|    | 8  |  |   |   |   |   |   |   |   |
|    | 9  |  |   |   | 3 |   | 1 |   | 1 |
|    | 10 |  | 1 |   |   |   | 1 |   | 1 |
|    | 11 |  |   |   |   |   |   |   |   |
|    | 12 |  |   |   |   |   | 1 |   | 1 |
| 11 | 1  |  | 1 | 1 |   |   | 1 | 1 |   |
|    | 2  |  |   |   |   |   |   |   |   |
|    | 3  |  |   | 2 |   | 1 |   | 1 |   |
|    | 4  |  |   |   |   |   |   |   |   |
|    | 5  |  |   | 2 |   | 1 |   | 1 |   |
|    | 6  |  |   | 1 |   | 1 |   | 1 |   |
|    | 7  |  |   |   |   |   |   |   |   |
|    | 8  |  |   |   | 2 |   |   | 1 |   |
|    | 9  |  |   |   | 2 |   | 1 |   | 1 |
|    | 10 |  |   |   | 1 |   | 1 |   |   |
|    | 11 |  |   |   |   |   |   |   |   |
|    | 12 |  |   | 1 | 1 |   | 1 |   | 1 |
| 12 | 1  |  |   | 2 |   | 1 |   |   |   |
|    | 2  |  |   |   |   |   |   |   |   |
|    | 3  |  |   |   |   |   |   |   |   |
|    | 4  |  |   | 2 |   | 1 |   |   |   |
|    | 5  |  | 1 | 1 |   | 1 |   |   |   |
|    | 6  |  |   |   |   |   |   |   |   |
|    | 7  |  |   |   |   |   |   |   |   |
|    | 8  |  |   | 1 | 2 |   | 1 |   |   |
|    | 9  |  |   | 1 | 2 |   |   |   |   |
|    | 10 |  |   | 1 | 1 |   | 1 |   |   |
|    | 11 |  |   |   | 2 |   | 1 |   |   |
|    | 12 |  |   | 1 | 3 |   | 1 |   |   |
| 13 | 1  |  | 1 | 1 |   |   |   |   |   |
|    | 2  |  |   | 1 |   |   |   | 1 |   |
|    | 3  |  | 1 | 1 | 1 |   | 1 |   |   |
|    | 4  |  |   |   | 2 |   |   |   |   |
|    | 5  |  | 1 | 1 | 1 |   |   |   |   |
|    | 6  |  |   |   |   |   |   |   |   |
|    | 7  |  | 1 |   | 1 |   |   |   |   |
|    | 8  |  |   | 1 | 2 |   | 1 |   | 1 |
|    | 9  |  | 1 | 1 | 1 |   | 1 |   | 1 |
|    | 10 |  | 1 | 2 |   |   | 1 |   |   |
|    | 11 |  |   | 1 | 1 |   | 1 |   | 1 |
|    | 12 |  |   | 1 | 1 |   | 1 |   | 1 |

14

1  
2  
3  
4  
5  
6  
7  
8  
9  
10  
11  
12

2

1

1

1  
1  
2  
2  
2  
2  
2  
2  
2  
2  
1

1  
1  
1  
  
1  
1  
1  
1  
1  
1  
1  
1

1



**Supplementary Table 4. Overall change in community composition.**

| <b>subject</b> | <b>overall (mean %) change of the bacterial community over year<sup>4</sup></b> | <b>standard deviation (%)</b> |
|----------------|---------------------------------------------------------------------------------|-------------------------------|
| 1              | 52.9                                                                            | 15.0                          |
| 2              | 4.3                                                                             | 3.3                           |
| 3              | 18.1                                                                            | 16.5                          |
| 4              | 70.0                                                                            | 16.4                          |
| 5              | 18.7                                                                            | 11.2                          |
| 6              | 24.8                                                                            | 13.4                          |
| 7              | 31.7                                                                            | 19.7                          |
| 8              | 25.0                                                                            | 24.7                          |
| 9              | 39.5                                                                            | 22.2                          |
| 10             | 38.9                                                                            | 18.4                          |
| 11             | 45.7                                                                            | 26.4                          |
| 12             | 27.4                                                                            | 21.9                          |
| 13             | 35.8                                                                            | 19.6                          |
| 14             | 64.3                                                                            | 18.2                          |

---

mean inverse of the Bray-Curtis similarity index

**Supplementary Table 5. Summary of bacterial community characteristics.<sup>5</sup>**

| Subject | mean FEV <sub>1</sub> (L) | mean species number | mean <i>P. aeruginosa</i> T-RF band % | TTR scaling component (w) | significance of TTR scaling component ( <i>P</i> ) | DDR scaling component | significance of DDR scaling component ( <i>P</i> ) |
|---------|---------------------------|---------------------|---------------------------------------|---------------------------|----------------------------------------------------|-----------------------|----------------------------------------------------|
| 1       | 2.13                      | 9.8                 | 4.65                                  | 0.078                     | 0.0001                                             | -0.036                | 0.533                                              |
| 2       | 0.95                      | 2.8                 | 93.59                                 | 0.084                     | 0.0001                                             | -0.007                | 0.275                                              |
| 3       | 1.08                      | 3.5                 | 77.22                                 | 0.139                     | 0.001                                              | -0.021                | 0.624                                              |
| 4       | 1.15                      | 4.7                 | 12.31                                 | 0.266                     | 0.0001                                             | -0.414                | 0.040                                              |
| 5       | 1.15                      | 5.4                 | 78.63                                 | 0.069                     | 0.003                                              | -0.035                | 0.254                                              |
| 6       | 1.71                      | 9.8                 | 17.49                                 | 0.049                     | 0.001                                              | -0.008                | 0.810                                              |
| 7       | 1.82                      | 5.1                 | 64.66                                 | 0.271                     | 0.0001                                             | -0.132                | 0.040                                              |
| 8       | 1.68                      | 5.2                 | 64.27                                 | 0.134                     | 0.0001                                             | -0.067                | 0.422                                              |
| 9       | 0.62                      | 10.3                | 26.48                                 | 0.169                     | 0.0001                                             | -0.086                | 0.102                                              |
| 10      | 2.81                      | 12.7                | 21.96                                 | 0.071                     | 0.0001                                             | -0.059                | 0.306                                              |
| 11      | 2.14                      | 10.7                | 25.62                                 | 0.124                     | 0.0001                                             | -0.05                 | 0.750                                              |
| 12      | 1.06                      | 2.6                 | 84.11                                 | 0.38                      | 0.0001                                             | -0.846                | 0.197                                              |
| 13      | 1.87                      | 6.8                 | 51.83                                 | 0.18                      | 0.0001                                             | -0.025                | 0.607                                              |
| 14      | 2.40                      | 7.3                 | 34.63                                 | 0.077                     | 0.001                                              | -0.173                | 0.186                                              |

<sup>5</sup> Shading denotes patients with a mean FEV<sub>1</sub> above the median (1.68 L) that shared at least 4 out of 5 of the following community characteristics: a mean species number > 7, a mean relative abundance of *P. aeruginosa* of < 35%, TTR and SDR values of < 0.1 with no statistical significance.

# Supplementary Figure 1

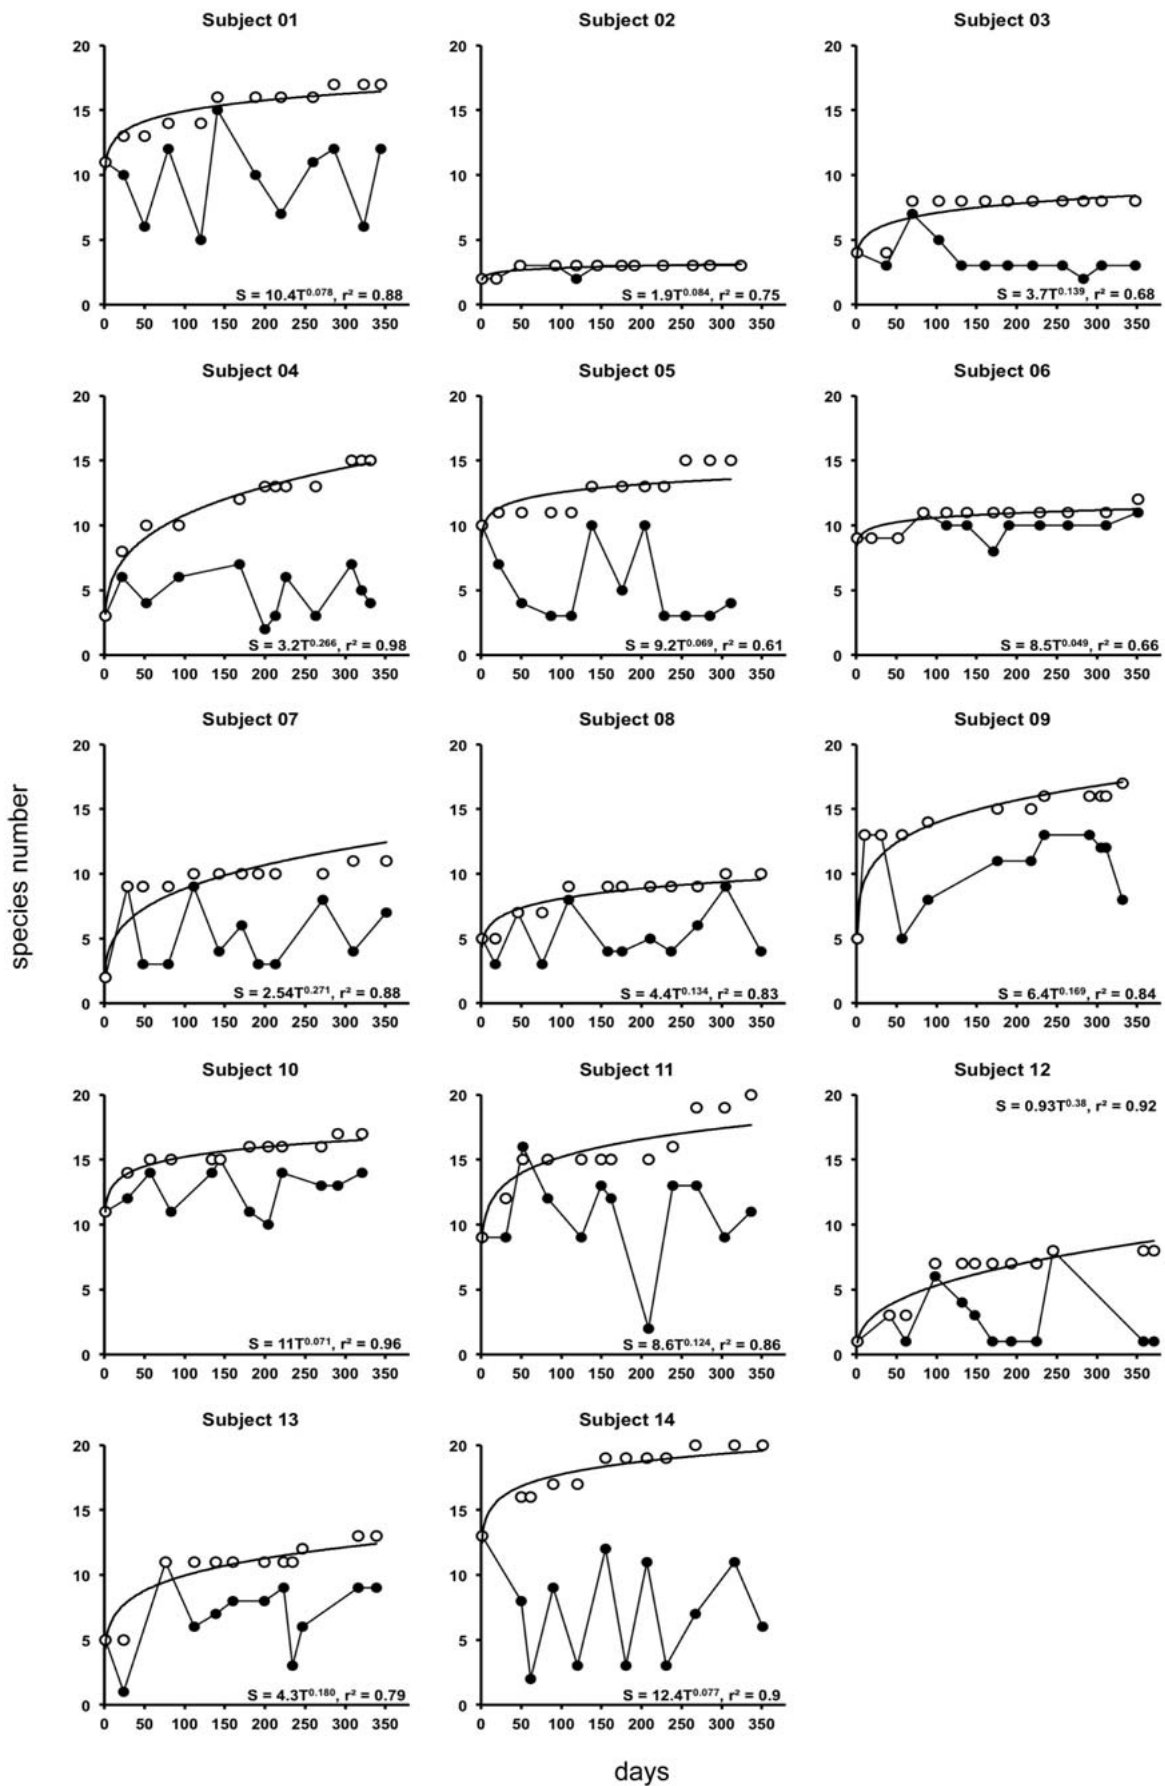

# Supplementary Figure 2

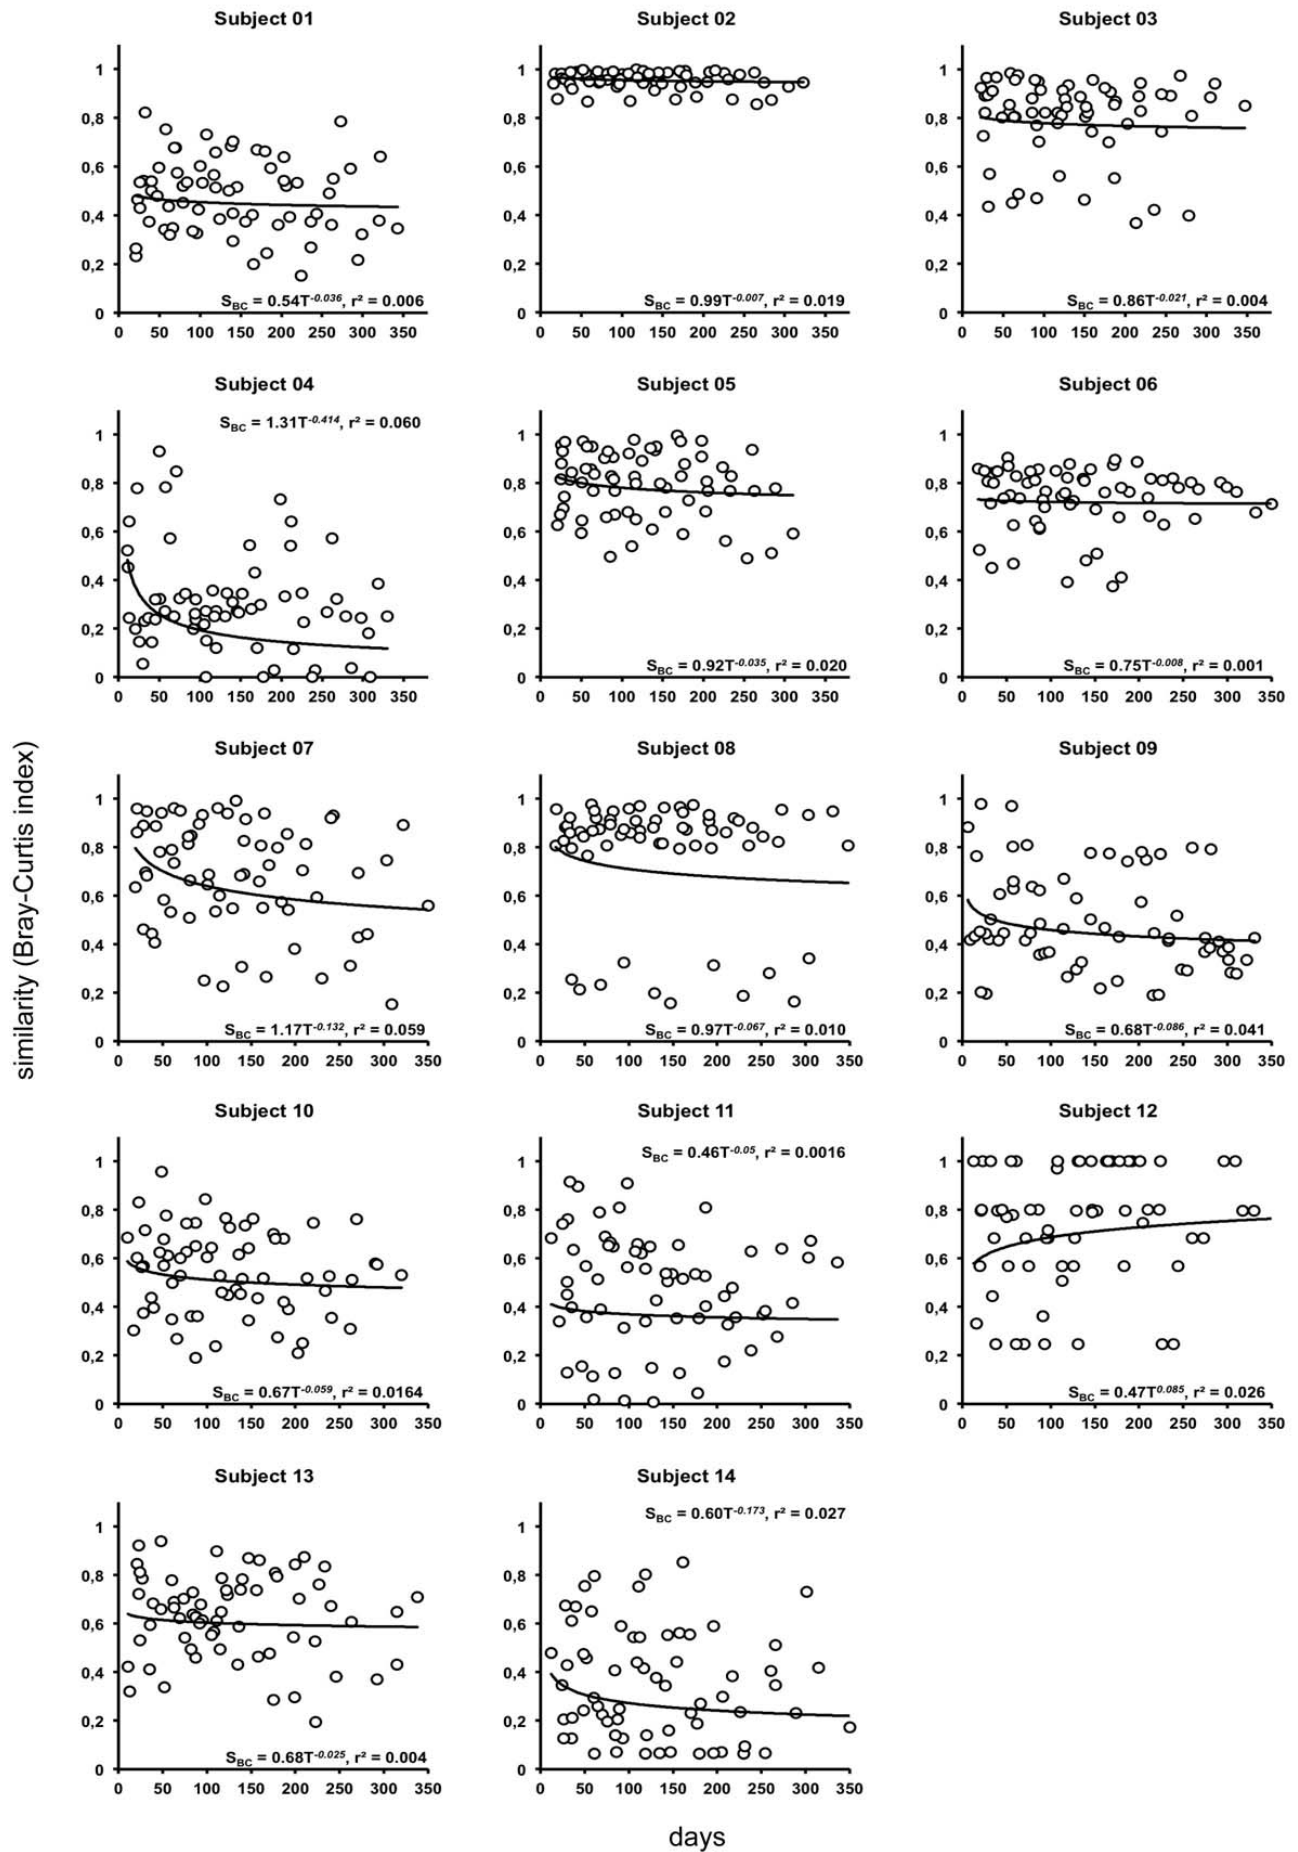

Supplementary Figure 3

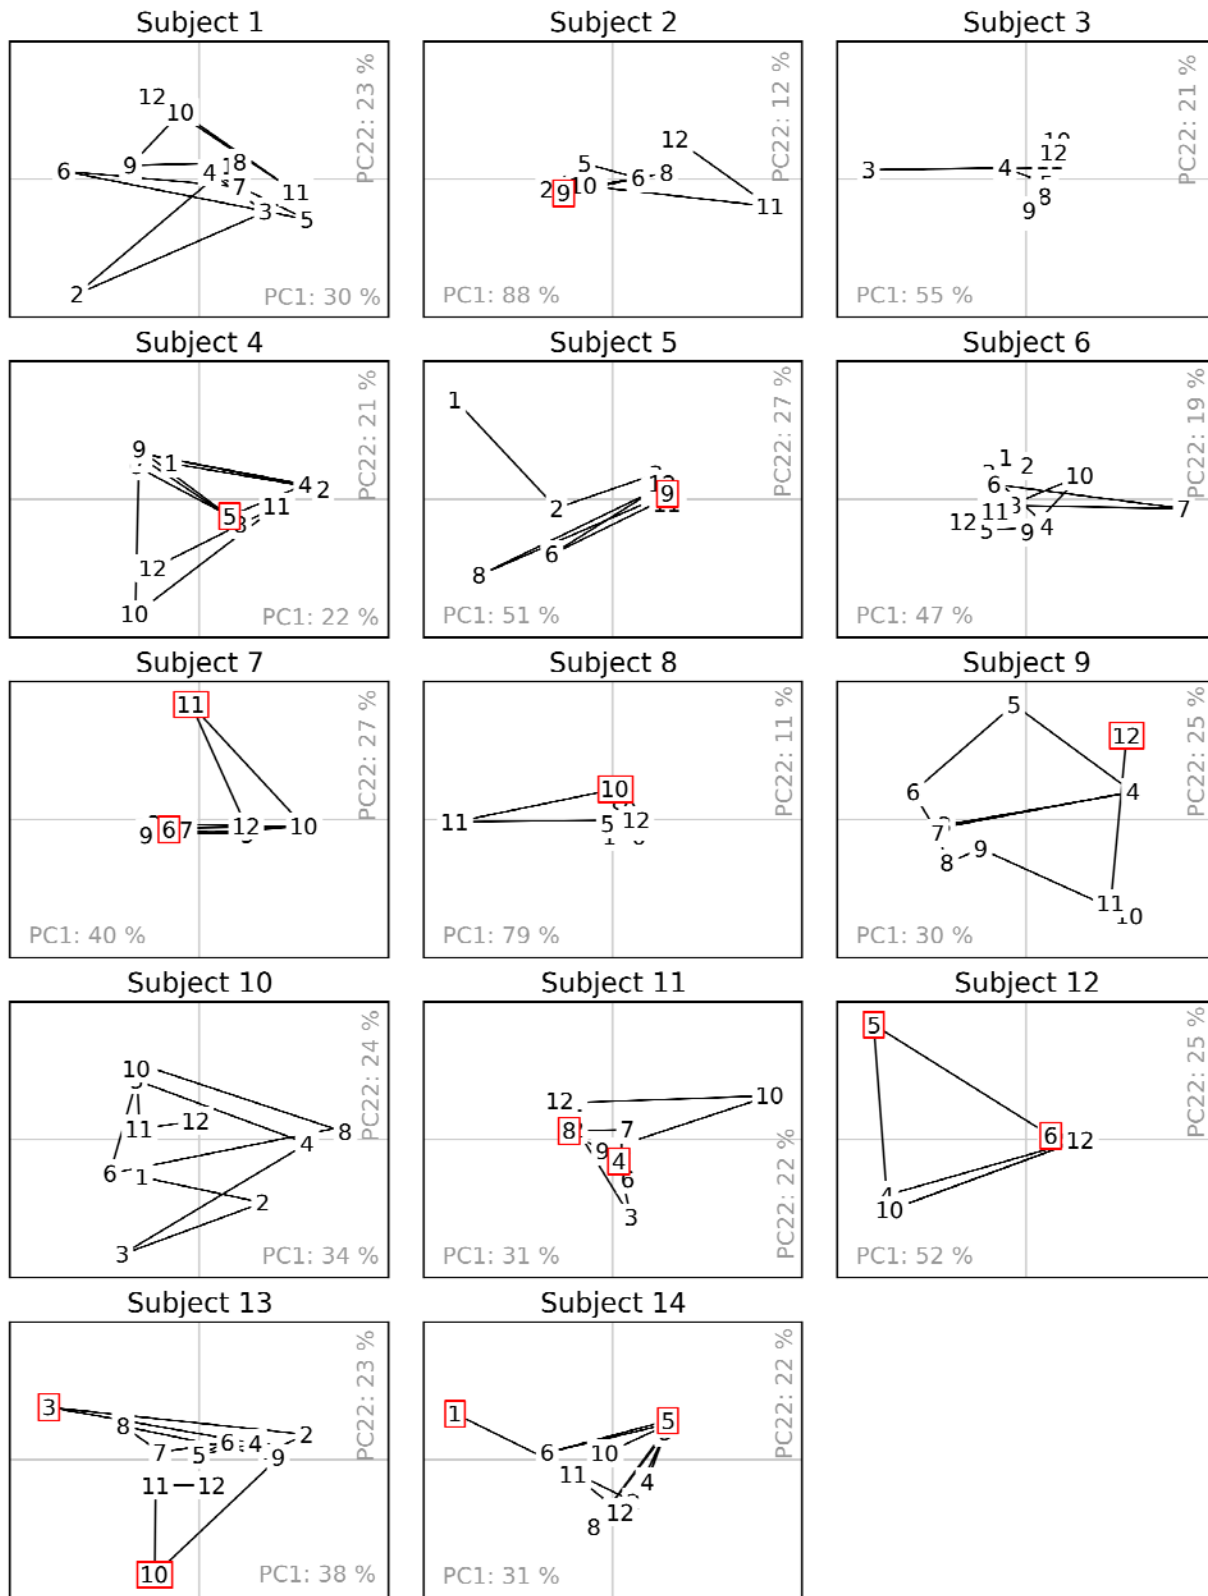

**Supplementary Figure 4**

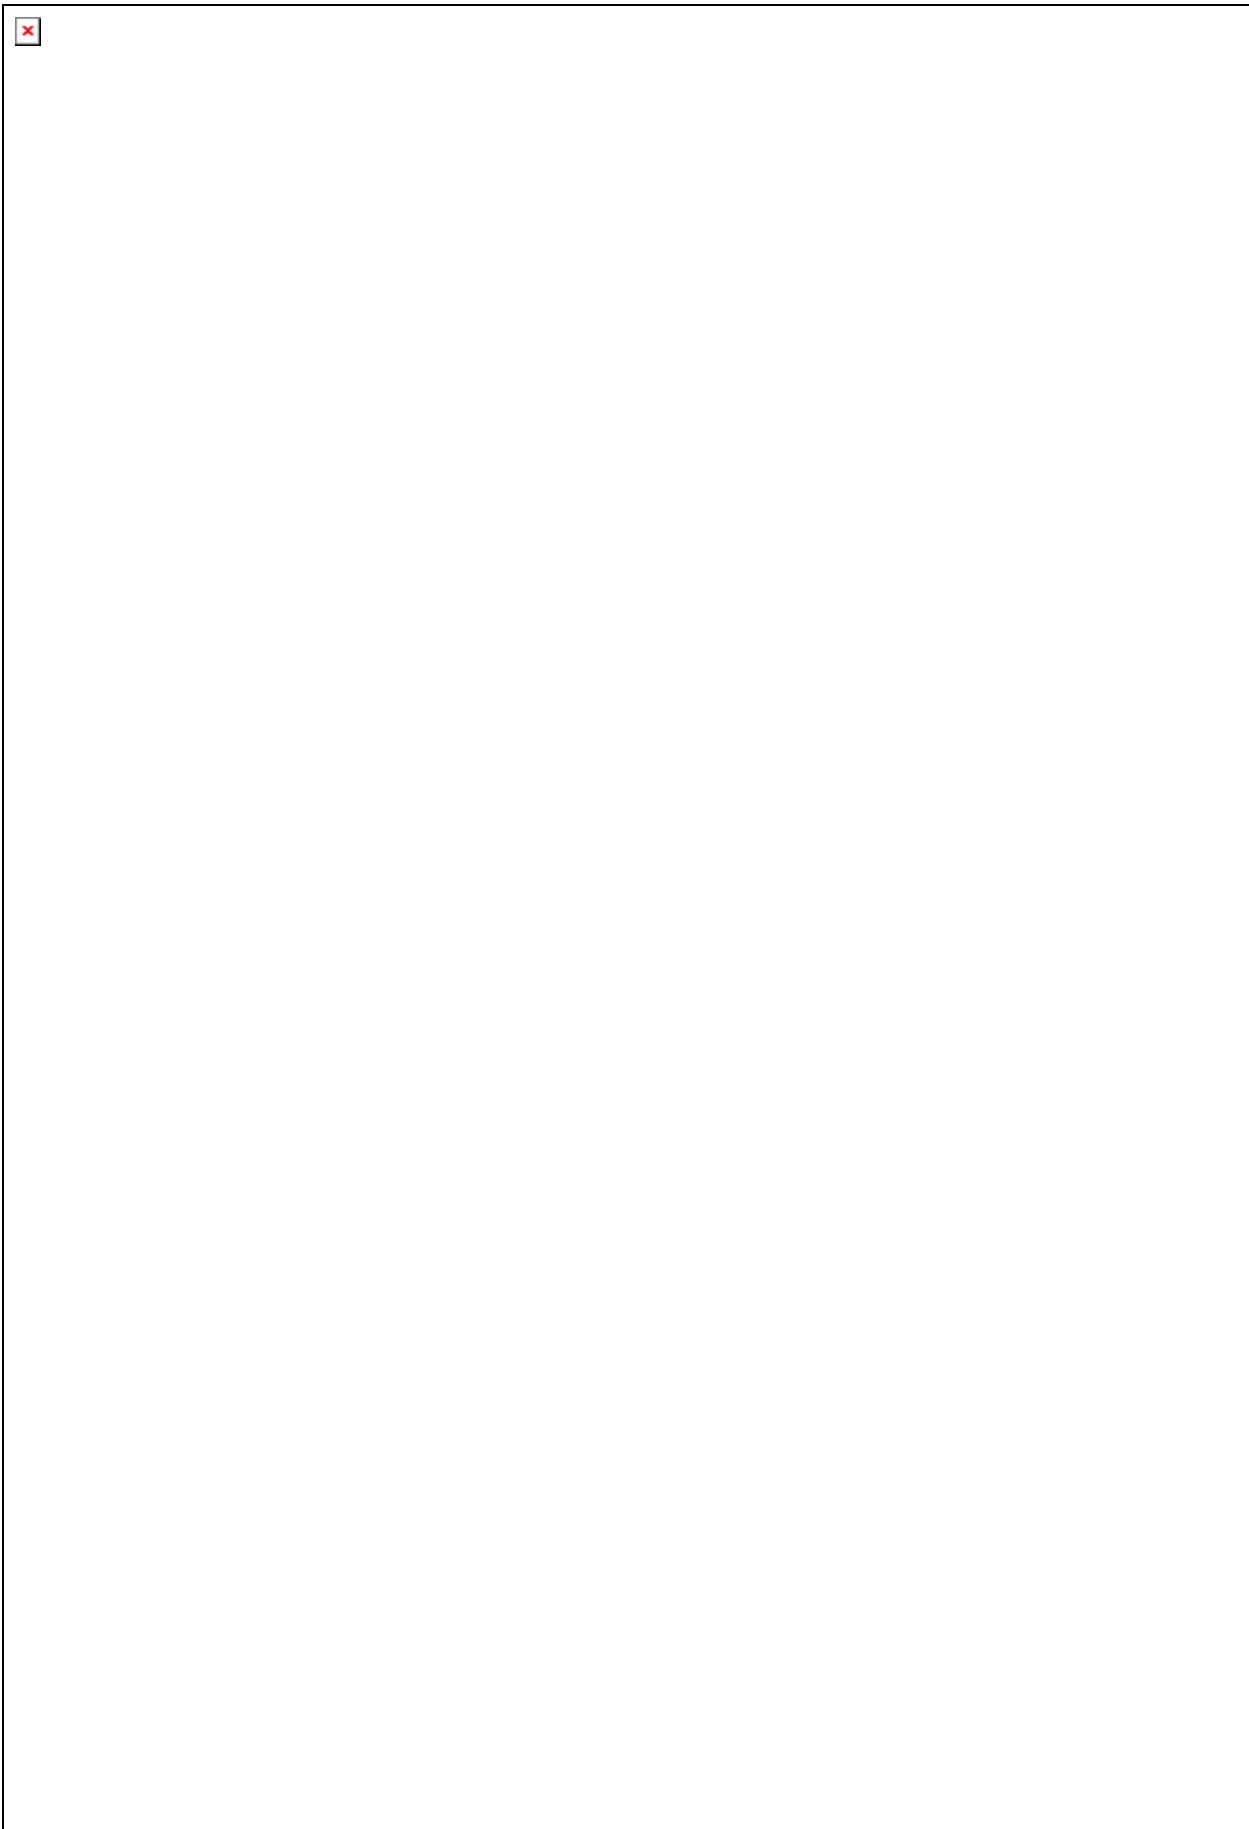

# Supplementary Figure 5

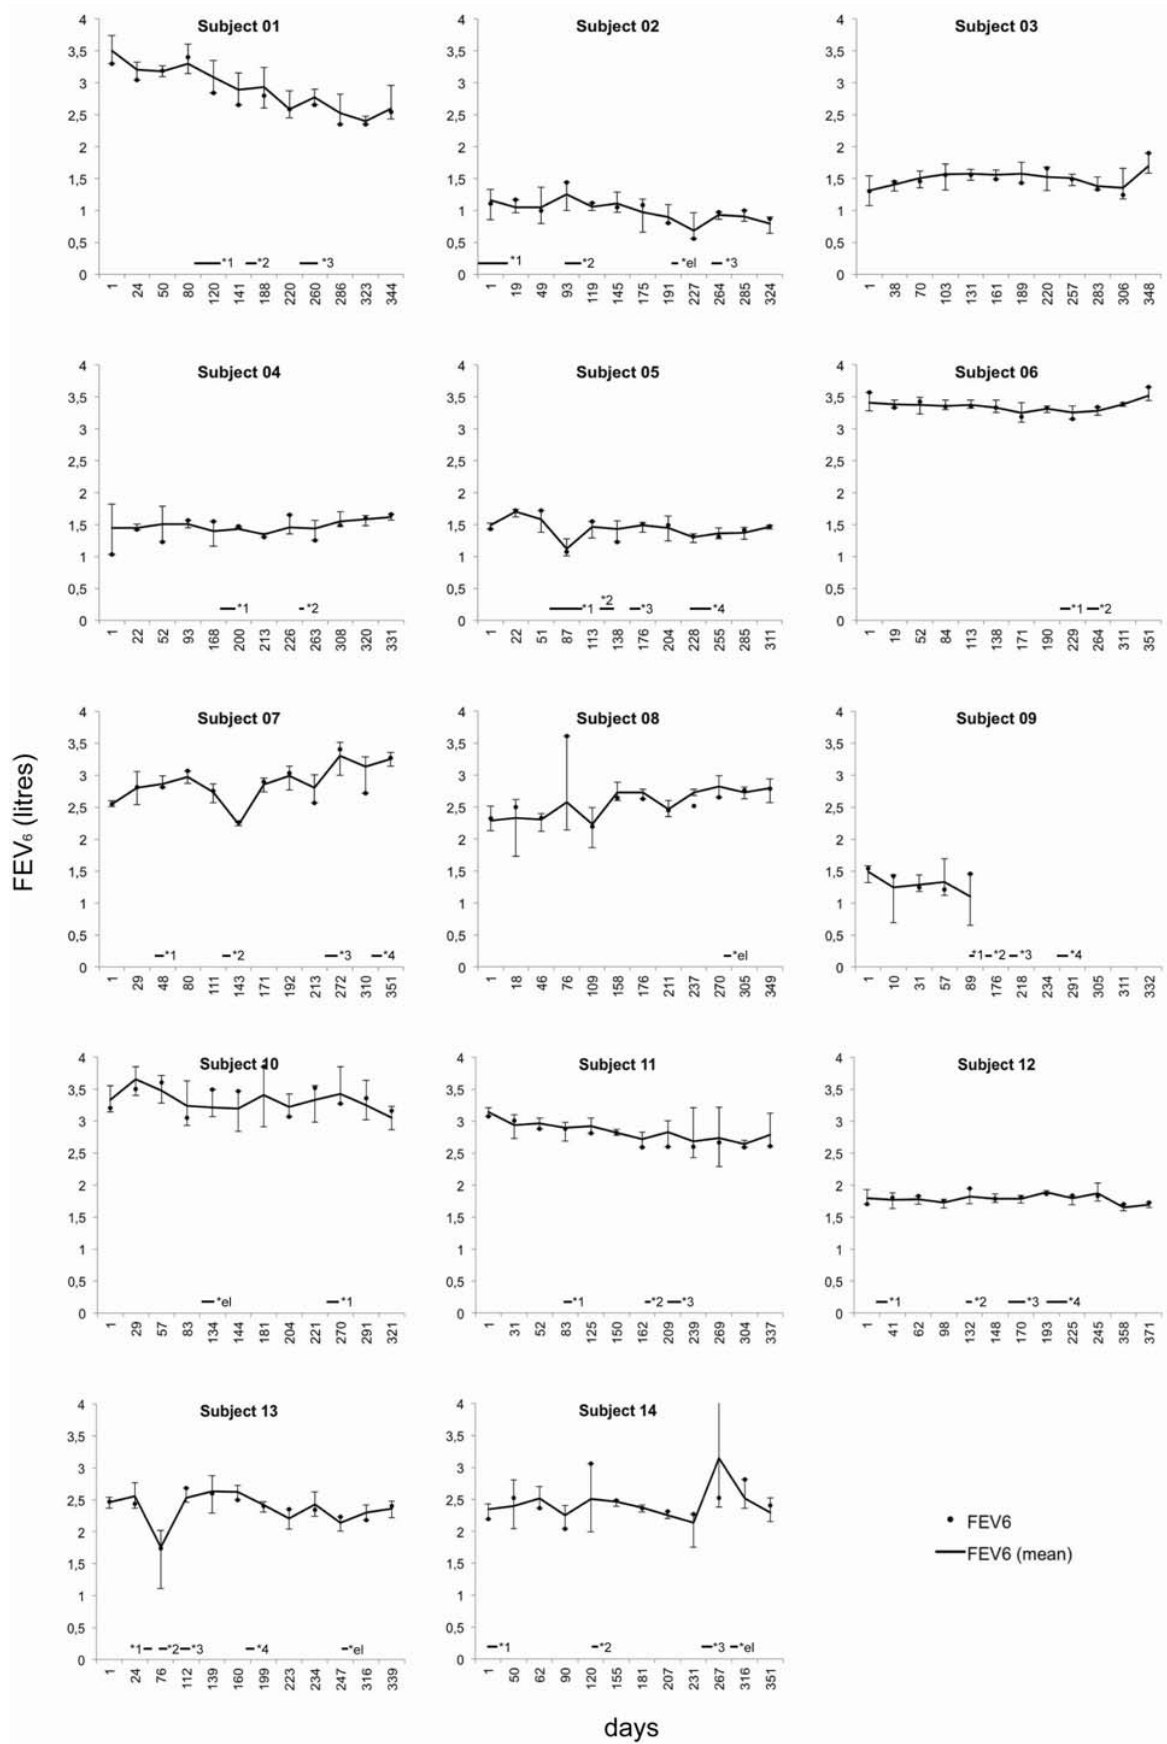

Supplement: thoraxjnl-2011-200932-s2.pdf [file thoraxjnl-2011-200932-s2.pdf]
